# Supplementary material for: A mono-copper doped undeca-gold cluster with up-converted and anti-stokes emissions of fluorescence and phosphorescence
Source: Royal Society of Chemistry journal article supplement (doi:10.1039/d0nr07624d), 2021-01-01
Supplement: d0nr07624d1.pdf [file d0nr07624d1.pdf]

## *Supporting Information for*

### **A Mono-Copper Doped Undeca-Gold Cluster with Up-converted and Anti-Stokes Emissions of Fluorescence and Phosphorescence**

Haiming Wu,<sup>#a</sup> Ye-Guang Fang,<sup>#b</sup> Rajini Anumula,<sup>#a</sup> Gaya N. Andrew,<sup>a</sup> Ganglong Cui,<sup>\*b</sup> Weihai Fang,<sup>b</sup> Zhixun Luo,<sup>\*a</sup> and Jiannian Yao<sup>a</sup>

<sup>a</sup> *Beijing National Laboratory for Molecular Sciences (BNLMS) and State Key Laboratory for Structural Chemistry of Unstable and Stable Species, Institute of Chemistry, Chinese Academy of Sciences, Beijing 100090, China.*

<sup>b</sup> *Key Laboratory of Theoretical and Computational Photochemistry, College of Chemistry, Beijing Normal University, Beijing 100875, China.*

<sup>\*</sup> *Correspondence. Email: zxlue@iccas.ac.cn (Z.L.); ganglong.cui@bnu.edu.cn (G.C.)*

<sup>#</sup> *These authors contributed equally to this paper and share first authorship.*

## **Contents**

|                                                       |   |
|-------------------------------------------------------|---|
| <b>S1. Experimental and theoretical methods</b> ..... | 2 |
| <b>S2. Experimental details</b> .....                 | 2 |
| <b>S3. Calculation details</b> .....                  | 6 |

## S1. Experimental and theoretical methods

**Chemicals.** All the reagents used in this study are of analytical grade and used without further purification. Copper (II) acetate [ $\text{Cu}(\text{OAc})_2$ , 99% purity] and cupric nitrate [ $\text{Cu}(\text{NO}_3)_2$ , 99% purity] were purchased from Alfa Aesar Chemical Reagent; hydrogen tetrachloroaurate ( $\text{HAuCl}_4 \cdot 4\text{H}_2\text{O}$ , 99.9% purity), 2-pyridinethiol ( $\text{C}_5\text{NH}_5\text{S}$ , 99% purity) and triphenylphosphine ( $\text{C}_{18}\text{H}_{15}\text{P}$ , 95% purity, 'PPh<sub>3</sub>' for short below) are from J&K Scientific Chemical Company; sodium borohydride ( $\text{NaBH}_4$ , 98% purity) and triethylamine ( $\text{C}_6\text{H}_{15}\text{N}$ , A.R.) from Acros Organics Chemicals. The solvents dichloromethane (DCM for short below), methanol, ethanol, n-pentane, diethyl ether and n-hexane were purchased from Beijing Chemical Reagent Co. Ltd. The distilled water used throughout all experiments was purified by a Millipore system.

**Synthesis of precursor AuClPPh<sub>3</sub>.** In this study, typically the starting material,  $\text{HAuCl}_4 \cdot 4\text{H}_2\text{O}$  (1 g), was dissolved in absolute ethanol (80 mL) which was taken in a round-bottom flask. Then PPh<sub>3</sub> (1.33 g) was dissolved in 40 mL ethanol which was then added to the above gold mixture under constant stirring for about 30 mins at room temperature, until the precipitates formed. Subsequently, the resulting solution was filtered and washed with diethyl ether three times, and finally dissolved in DCM. White crystals of AuClPPh<sub>3</sub> were obtained after layering the filtrate with excess pentane. As the AuClPPh<sub>3</sub> is a light sensitive chemical, all the above operations were carried out in dark conditions.

**Synthesis of Au<sub>11</sub>Cu<sub>1</sub> nanocluster.** In a glass vial,  $\text{Cu}(\text{OAc})_2$  (30 mg) and  $\text{Cu}(\text{NO}_3)_2$  (30 mg) were dissolved in methanol under sonication. To this solution, 50 mg of as-prepared AuClPPh<sub>3</sub> precursor which dissolved in DCM was added under an ice-bath. A freshly prepared solution SPy (~ 50 mg) and PPh<sub>3</sub> (~ 31 mg) in DCM was added, respectively. After stirring (~ 20 mins), ~ 4 mL of  $\text{NaBH}_4$  and ~ 0.4 mL of triethylamine were added together quickly to the above solution. This solution was kept under stirring and aged for one day at 0 °C and then was washed several times with distilled water for one- or two-days using centrifuge. Afterwards, the solution was centrifuged by rotavapor and the obtained brown extract was thus crystalized in DCM/hexane (1:4) at 4 °C and kept for black single crystal growth for 13 days. The yield of Au<sub>11</sub>Cu<sub>1</sub> was up to ~40 % and the washed nanocluster is stored at 4 °C found to be highly stable for several months.

**Characterization.** The single-crystal X-ray diffraction (XRD) data of the synthesized bimetallic Au<sub>11</sub>Cu<sub>1</sub> nanocluster was measured on an XtaLAB AFC10 (RCD3) fixed-chi single crystal X-ray diffractometer with Mo K $\alpha$  radiation ( $\lambda=0.71073$  Å) at 103.15 K. Single crystal structure was solved by direct methods and refined with full-matrix-least-squares on  $F^2$ . Electrospray ionization time-of-flight mass spectrometry (ESI-TOF-MS) measurements were conducted by a MicroTOF-QIII High-resolution Mass Spectrometer in the negative ionization mode. The UV-Vis absorption spectra were collected using an UV-3600 Shimadzu UV-Vis-NIR Spectrophotometer. Photoluminescence spectra were recorded by a Horiba Scientific Fluoromax-4 spectrofluorometer.

## S2. Experimental details

- Single crystal parsing

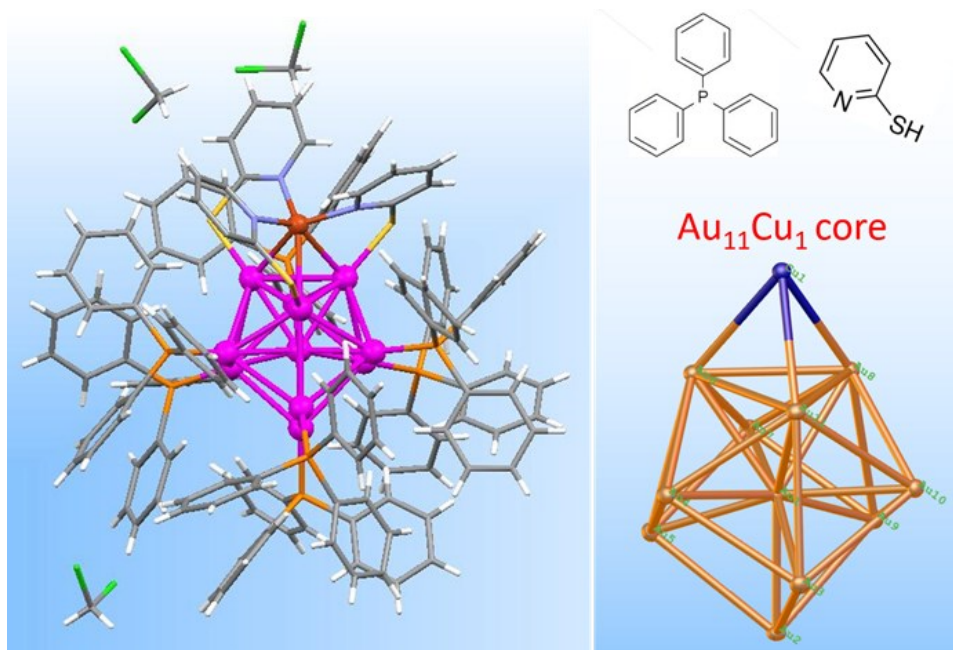

**Fig. S1** Single crystal parsing of the synthesized  $[\text{Au}_{11}\text{Cu}_1(\text{PPh}_3)_7(\text{SPy})_3]^+$  cluster, where the three Au-Cu edges are protected by 3-SPy ligands via one leg of N atoms bonding to Cu and the other leg of sulfur bonding to Au (No. 6, 8, 11); while the other seven surface Au atoms (except the central Au1) are protected by 7  $\text{PPh}_3$  ligands.

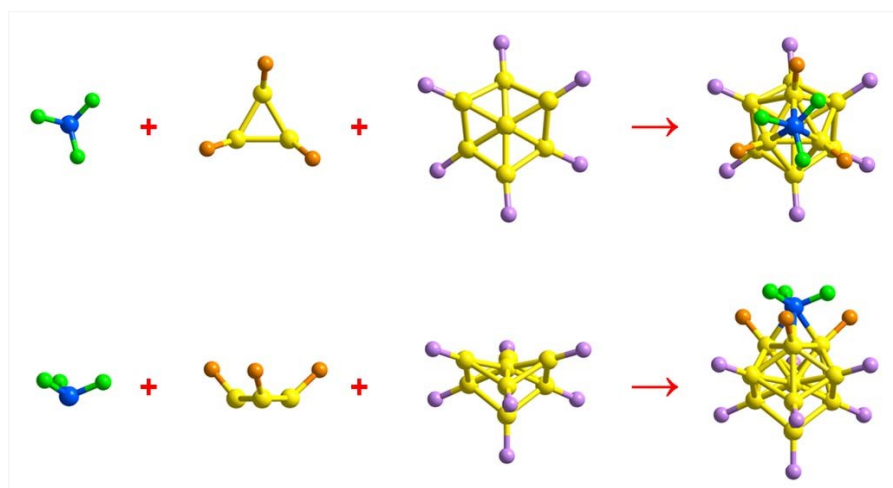

**Fig. S2** The  $\text{Au}_{11}\text{Cu}_1\text{N}_3\text{S}_3\text{P}_7$  unit of the nanocluster. Au, yellow; Cu, blue; S, orange; P, violet; N, green; Cl, light blue. For clarity, C and H are omitted.

**Table S1** Crystallographic data for compound Au<sub>11</sub>Cu<sub>1</sub> nanocluster.

|                                   |                                                                                                                   |                  |
|-----------------------------------|-------------------------------------------------------------------------------------------------------------------|------------------|
| Empirical formula                 | C <sub>144</sub> H <sub>123</sub> Au <sub>11</sub> Cl <sub>6</sub> CuN <sub>3</sub> P <sub>7</sub> S <sub>3</sub> |                  |
| Formula weight                    | 4651.29                                                                                                           |                  |
| Temperature                       | 103.15 K                                                                                                          |                  |
| Wavelength                        | 0.71073 Å                                                                                                         |                  |
| Crystal system                    | Monoclinic                                                                                                        |                  |
| Space group                       | P 1 21/c 1                                                                                                        |                  |
| Unit cell dimensions              | a = 17.0278(2) Å                                                                                                  | α = 90°          |
|                                   | b = 37.9099(4) Å                                                                                                  | β = 99.3170(10)° |
|                                   | c = 26.2407(3) Å                                                                                                  | γ = 90°          |
| Volume                            | 16715.5(3) Å <sup>3</sup>                                                                                         |                  |
| Z                                 | 4                                                                                                                 |                  |
| Density (calculated)              | 1.848 Mg/m <sup>3</sup>                                                                                           |                  |
| Absorption coefficient            | 9.979 mm <sup>-1</sup>                                                                                            |                  |
| F(000)                            | 8644                                                                                                              |                  |
| Crystal size                      | 0.759 x 0.259 x 0.225 mm <sup>3</sup>                                                                             |                  |
| Theta range for data collection   | 1.620 to 27.485°.                                                                                                 |                  |
| Index ranges                      | -22 ≤ h ≤ 22, -49 ≤ k ≤ 49, -33 ≤ l ≤ 34                                                                          |                  |
| Reflections collected             | 225567                                                                                                            |                  |
| Independent reflections           | 38285 [R(int) = 0.0869]                                                                                           |                  |
| Completeness to theta = 25.242°   | 100.0 %                                                                                                           |                  |
| Absorption correction             | Semi-empirical from equivalents                                                                                   |                  |
| Max. and min. transmission        | 1.00000 and 0.01073                                                                                               |                  |
| Refinement method                 | Full-matrix least-squares on F <sup>2</sup>                                                                       |                  |
| Data / restraints / parameters    | 38285 / 36 / 1575                                                                                                 |                  |
| Goodness-of-fit on F <sup>2</sup> | 1.049                                                                                                             |                  |
| Final R indices [I > 2σ(I)]       | R1 = 0.0442, wR2 = 0.1106                                                                                         |                  |
| R indices (all data)              | R1 = 0.0513, wR2 = 0.1140                                                                                         |                  |
| Extinction coefficient            | n/a                                                                                                               |                  |
| Largest diff. peak and hole       | 2.406 and -2.994 e.Å <sup>-3</sup>                                                                                |                  |

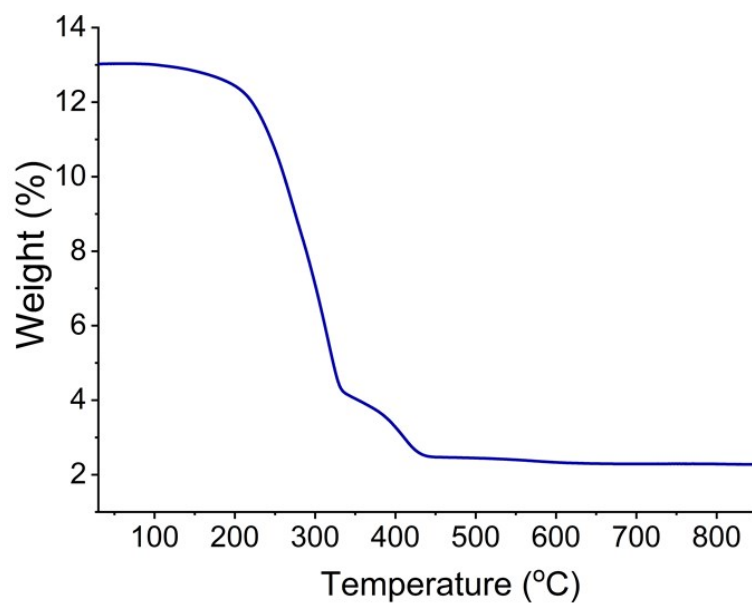

**Fig. S3** The TG-DTA curve of  $[\text{Au}_{11}\text{Cu}_1(\text{PPh}_3)_7(\text{SPy})_3]^+$  cluster.

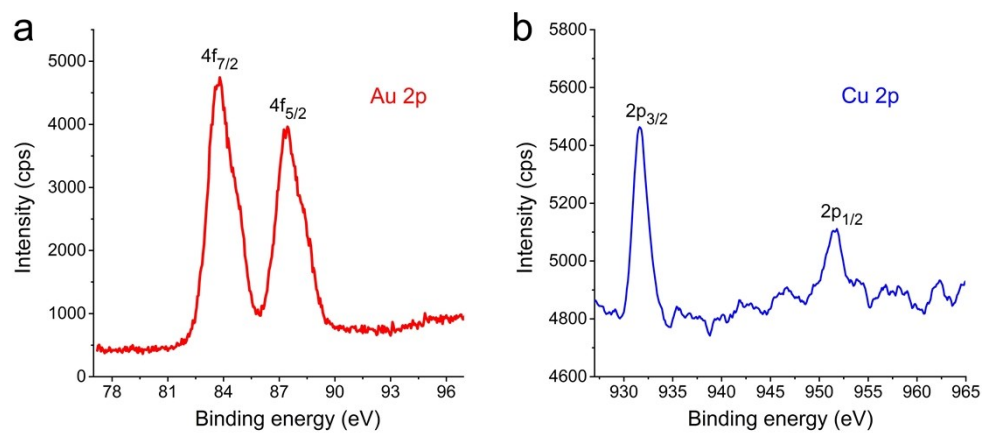

**Fig. S4** XPS patterns of Au 4f (a) and Cu 2p (b) of  $[\text{Au}_{11}\text{Cu}_1(\text{PPh}_3)_7(\text{SPy})_3]^+$  cluster.

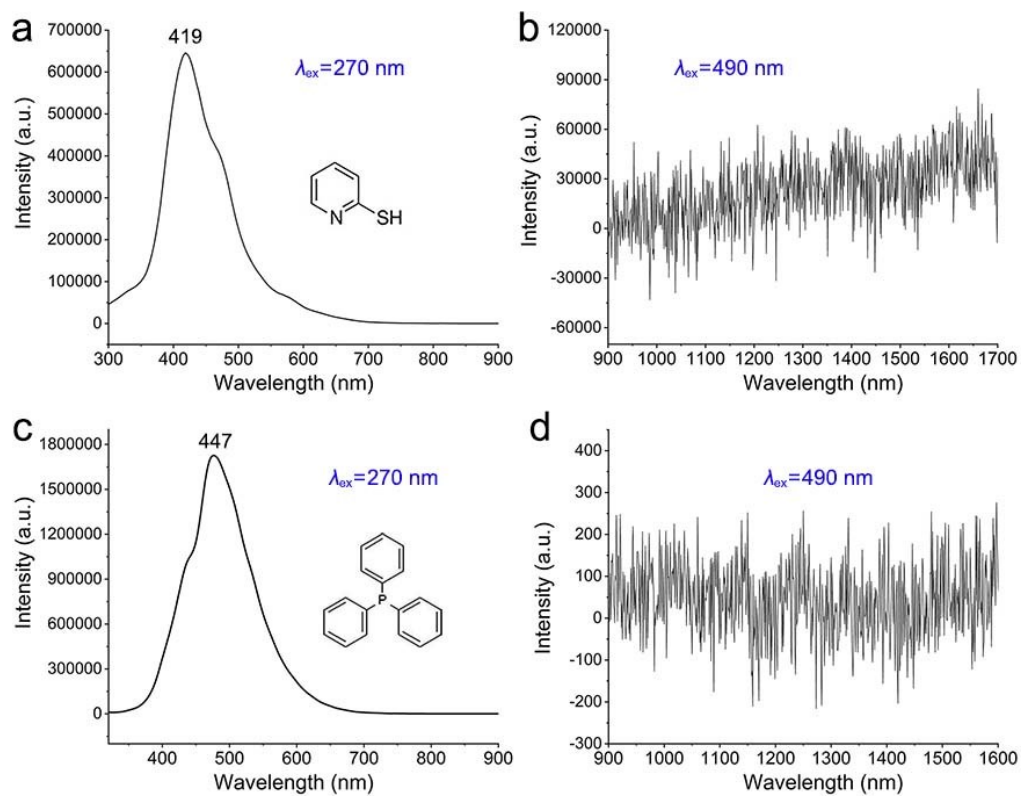

**Fig. S5** Emission spectra of the ligands 2-pyridinethiol (a-b) and triphenylphosphine in DCM excited at 270 and 490 nm, respectively.

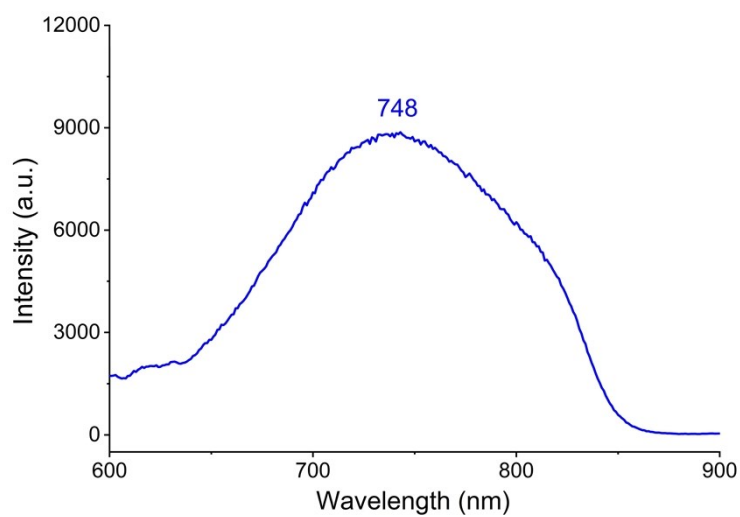

**Fig. S6** Emission spectra of  $[\text{Au}_{11}\text{Cu}_1(\text{PPh}_3)_7(\text{SPy})_3]^+$  nanocluster in solid state.

### S3. Calculation details

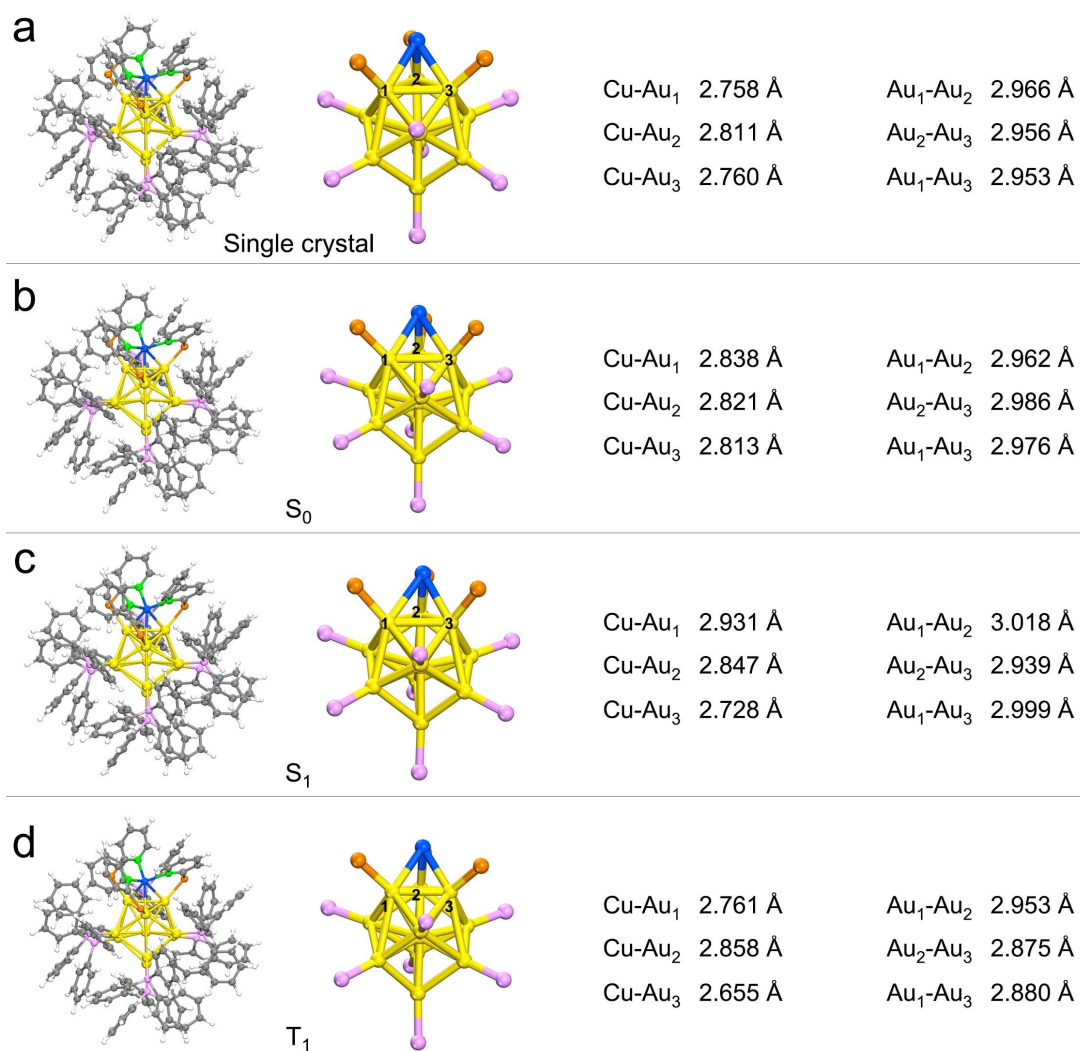

**Fig. S7** The structures and bond lengths of (a) single crystal and (b-d) optimized structures at S<sub>0</sub>, S<sub>1</sub>, T<sub>1</sub> minimum. Au, yellow; Cu, blue; S, orange; P, violet; N, green; Cl, light blue; C, gray; H, white.

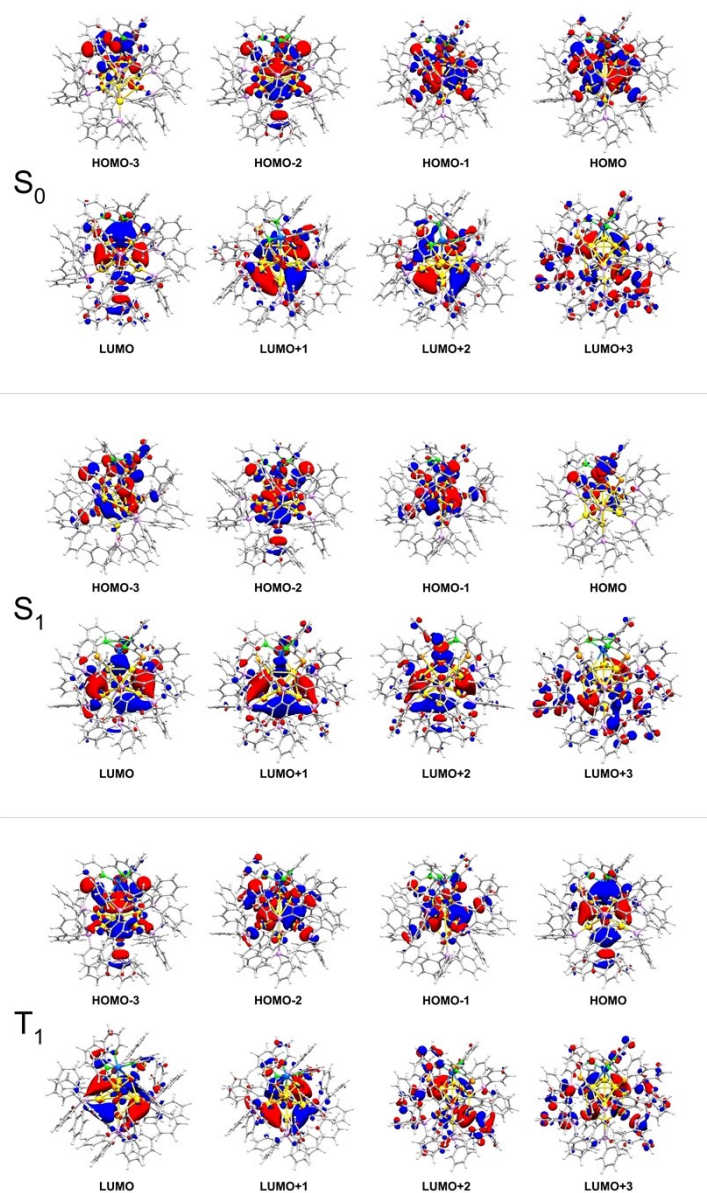

**Fig. S8** Selected TD-B3LYP calculated frontier molecular orbitals at the  $S_0$ ,  $S_1$ ,  $T_1$  minimum.

**Table S2** TD-B3LYP computed energies at the optimized  $S_0$ ,  $S_1$  and  $T_1$  minimum.

|       | Energy (hartree) | HOMO-LUMO gap (eV) |
|-------|------------------|--------------------|
| $S_0$ | -10879.19597     | 2.88               |
| $S_1$ | -10879.13023     | 2.59               |
| $T_1$ | -10879.13479     | 1.08               |



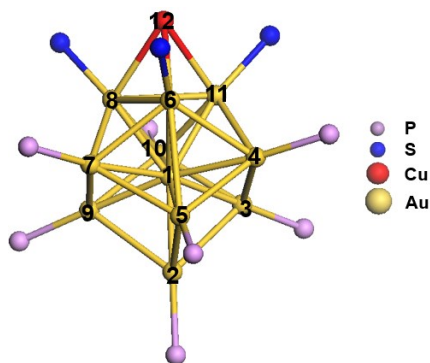

**Fig. S9** The numbering of  $[\text{Au}_{11}\text{Cu}_1(\text{PPh}_3)_7(\text{SPy})_3]^+$  core at the optimized  $S_0$  minimum.

**Table S3** DFT computed  $[\text{Au}_{11}\text{Cu}_1(\text{PPh}_3)_7(\text{SPy})_3]^+$  natural population analysis (NPA) charges of several key atoms in at the optimized  $S_0$  minimum.

| Atoms | Au <sub>1</sub> | Au <sub>2</sub> | Au <sub>3</sub>  | Au <sub>4</sub>  | Au <sub>5</sub>  | Au <sub>6</sub> | Au <sub>7</sub> |
|-------|-----------------|-----------------|------------------|------------------|------------------|-----------------|-----------------|
| NPA   | -2.45           | 0.21            | 0.18             | 0.19             | 0.17             | 0.07            | 0.18            |
|       |                 |                 |                  |                  |                  |                 |                 |
| Atoms | Au <sub>8</sub> | Au <sub>9</sub> | Au <sub>10</sub> | Au <sub>11</sub> | Cu <sub>12</sub> | P (avg)         | S (avg)         |
| NPA   | 0.06            | 0.18            | 0.19             | 0.07             | 0.52             | 0.92            | -0.15           |

**Table S4** TD-B3LYP computed wavelengths (nm, eV in brackets), oscillator strengths, and electronic configurations weights (in %) of strong electronic excitation transitions at the optimized  $S_0$  minimum.

| Excited state   | Wavelength | Oscillator strength | Electronic configurations weights (in %)                         |
|-----------------|------------|---------------------|------------------------------------------------------------------|
| S <sub>1</sub>  | 561 (2.21) | 0.0085              | HOMO → LUMO (91)                                                 |
| S <sub>2</sub>  | 559 (2.22) | 0.0090              | HOMO-1 → LUMO (92)                                               |
| S <sub>3</sub>  | 530 (2.34) | 0.0025              | HOMO-1 → LUMO+1 (28)<br>HOMO → LUMO+1 (25)<br>HOMO → LUMO+2 (25) |
| S <sub>4</sub>  | 521 (2.38) | 0.0186              | HOMO-1 → LUMO+1 (30)<br>HOMO → LUMO+2 (55)                       |
| S <sub>5</sub>  | 521 (2.38) | 0.0163              | HOMO → LUMO+1 (62)                                               |
| S <sub>21</sub> | 431 (2.87) | 0.0557              | HOMO-2 → LUMO+3 (54)                                             |

**Table S5** TD-B3LYP computed wavelengths (nm, eV in brackets), oscillator strengths, and electronic configurations weights (in %) of strong electronic excitation transitions at the optimized S<sub>1</sub> minimum.

| Excited state  | Wavelength | Oscillator strength | Electronic configurations weights (in %) |
|----------------|------------|---------------------|------------------------------------------|
| S <sub>1</sub> | 634 (1.95) | 0.0020              | HOMO → LUMO (87)                         |
| S <sub>2</sub> | 614 (2.02) | 0.0035              | HOMO-1 → LUMO (95)                       |
| S <sub>3</sub> | 560 (2.21) | 0.0101              | HOMO → LUMO+1 (32)<br>HOMO → LUMO+2 (35) |
| S <sub>4</sub> | 557 (2.22) | 0.0183              | HOMO-2 → LUMO (71)                       |
| S <sub>5</sub> | 548 (2.26) | 0.0047              | HOMO-3 → LUMO (65)                       |

**Table S6** TD-B3LYP calculated molecular orbital levels (in eV) and relevant weights (in %) with respect to Au<sub>11</sub>, Cu<sub>1</sub>, and P, S, N, C and H atoms of [Au<sub>11</sub>Cu<sub>1</sub>(PH<sub>3</sub>)<sub>7</sub>(SPy)<sub>3</sub>]<sup>+</sup> at its S<sub>0</sub> minimum.

| Orbitals | Energy (eV) | Weights (%)      |                 |       |
|----------|-------------|------------------|-----------------|-------|
|          |             | Au <sub>11</sub> | Cu <sub>1</sub> | PSNCH |
| LUMO+3   | -3.67       | 63.14            | 1.20            | 35.66 |
| LUMO+2   | -3.81       | 62.27            | 5.57            | 32.17 |
| LUMO+1   | -3.914      | 71.75            | 0.39            | 27.86 |
| LUMO     | -3.921      | 71.74            | 0.37            | 27.89 |
| HOMO     | -6.75       | 44.01            | 20.90           | 35.09 |
| HOMO-1   | -6.76       | 46.23            | 18.42           | 35.34 |
| HOMO-2   | -6.91       | 48.86            | 10.82           | 40.32 |
| HOMO-3   | -6.92       | 25.22            | 35.73           | 39.04 |
| HOMO-4   | -6.95       | 28.16            | 32.67           | 39.17 |
| HOMO-5   | -7.13       | 16.92            | 2.72            | 80.36 |
| HOMO-6   | -7.47       | 22.92            | 10.73           | 66.35 |
| HOMO-7   | -7.48       | 23.41            | 10.32           | 66.27 |
| HOMO-8   | -7.60       | 12.87            | 65.09           | 22.03 |
| HOMO-9   | -7.74       | 18.29            | 63.57           | 18.14 |
| HOMO-10  | -7.75       | 17.52            | 65.18           | 17.31 |
| HOMO-11  | -8.05       | 49.87            | 27.01           | 23.12 |
| HOMO-12  | -8.07       | 51.27            | 24.80           | 23.92 |
| HOMO-13  | -8.43       | 64.59            | 7.59            | 27.83 |

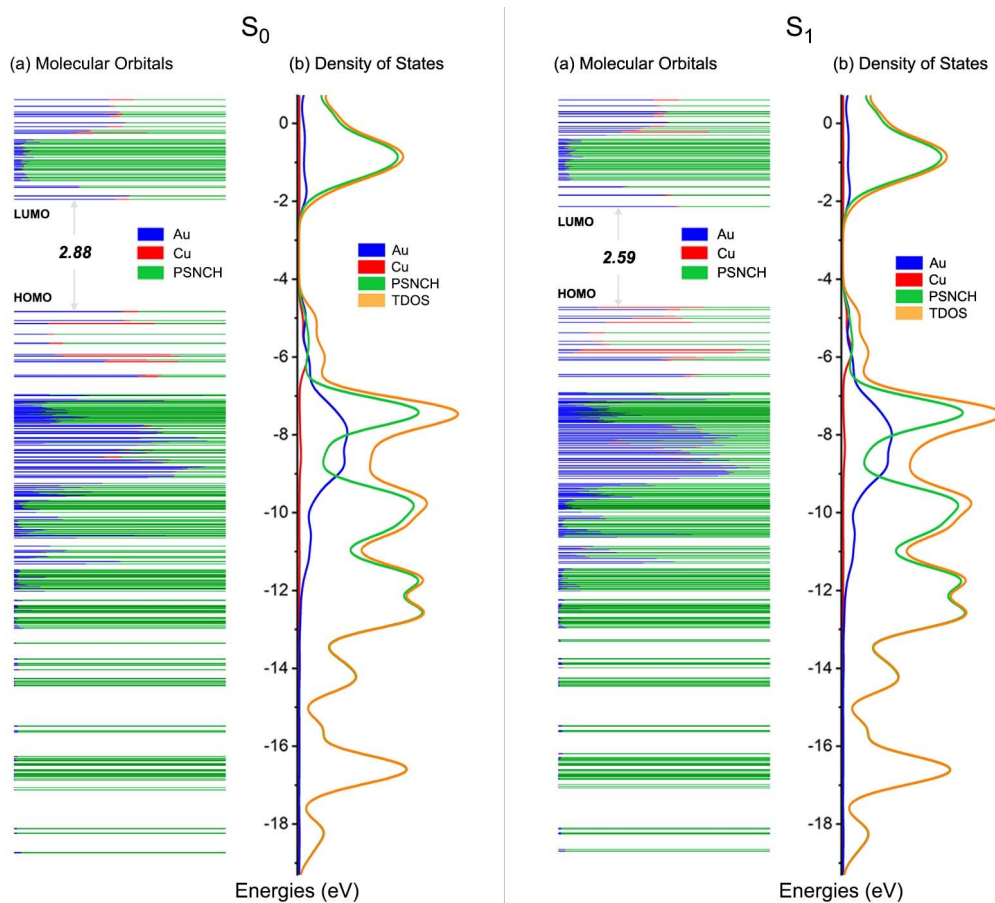

**Fig. S10** (a) Kohn-Sham orbital energy level diagram and (b) total and partial density of states (DOS) of the  $[\text{Au}_{11}\text{Cu}_1(\text{PPh}_3)_7(\text{SPy})_3]^+$  at the  $S_0$ ,  $S_1$  minimum.

**Table S7** TD-B3LYP calculated molecular orbital levels and relevant weights with respect to  $\text{Au}_{11}$ ,  $\text{Cu}_1$ , and P, S, N, C and H atoms of  $[\text{Au}_{11}\text{Cu}_1(\text{PPh}_3)_7(\text{SPy})_3]^+$  at the  $S_0$  and  $S_1$  minimum.

|          | S <sub>0</sub> |                  |                 |       | S <sub>1</sub> |                  |                 |       |
|----------|----------------|------------------|-----------------|-------|----------------|------------------|-----------------|-------|
| Orbitals | Energy<br>(eV) | Weights (%)      |                 |       | Energy<br>(eV) | Weights (%)      |                 |       |
|          |                | Au <sub>11</sub> | Cu <sub>1</sub> | PSNCH |                | Au <sub>11</sub> | Cu <sub>1</sub> | PSNCH |
| LUMO+3   | -1.63          | 30.27            | 0.68            | 69.05 | -1.63          | 30.18            | 0.42            | 69.39 |
| LUMO+2   | -1.85          | 54.52            | 0.49            | 44.99 | -1.84          | 49.59            | 3.30            | 47.11 |
| LUMO+1   | -1.86          | 53.46            | 0.51            | 46.03 | -1.84          | 51.07            | 2.14            | 46.79 |
| LUMO     | -1.94          | 47.70            | 6.73            | 45.57 | -2.13          | 55.08            | 1.96            | 42.96 |
| HOMO     | -4.82          | 50.13            | 8.51            | 41.36 | -4.72          | 18.45            | 50.45           | 31.11 |
| HOMO-1   | -4.83          | 51.53            | 7.15            | 41.31 | -4.78          | 50.84            | 6.89            | 42.28 |
| HOMO-2   | -5.06          | 52.02            | 2.83            | 45.16 | -4.94          | 49.65            | 5.49            | 44.86 |
| HOMO-3   | -5.13          | 15.86            | 50.37           | 33.77 | -5.00          | 34.98            | 23.67           | 41.34 |
| HOMO-4   | -5.14          | 16.14            | 50.30           | 33.56 | -5.11          | 22.27            | 41.12           | 36.61 |
| HOMO-5   | -5.41          | 15.69            | 3.29            | 81.01 | -5.37          | 14.42            | 7.55            | 78.04 |
| HOMO-6   | -5.63          | 16.27            | 6.77            | 76.97 | -5.59          | 16.37            | 5.01            | 78.62 |
| HOMO-7   | -5.65          | 16.62            | 6.43            | 76.96 | -5.67          | 20.03            | 4.46            | 75.52 |
| HOMO-8   | -5.93          | 19.19            | 54.80           | 26.01 | -5.80          | 10.02            | 78.76           | 11.22 |
| HOMO-9   | -5.96          | 23.86            | 53.56           | 22.59 | -5.82          | 10.72            | 76.32           | 12.96 |
| HOMO-10  | -5.97          | 23.14            | 55.32           | 21.54 | -5.89          | 7.05             | 76.67           | 16.29 |
| HOMO-11  | -6.07          | 44.60            | 18.24           | 37.15 | -6.00          | 52.83            | 12.56           | 34.61 |
| HOMO-12  | -6.11          | 42.01            | 35.11           | 22.89 | -6.05          | 48.16            | 20.85           | 30.99 |
| HOMO-13  | -6.12          | 42.43            | 35.33           | 22.26 | -6.08          | 51.65            | 1.63            | 46.73 |
| HOMO-14  | -6.45          | 62.31            | 7.60            | 30.09 | -6.45          | 61.32            | 3.93            | 34.75 |
| HOMO-15  | -6.49          | 58.16            | 9.69            | 32.15 | -6.45          | 64.07            | 4.19            | 31.74 |

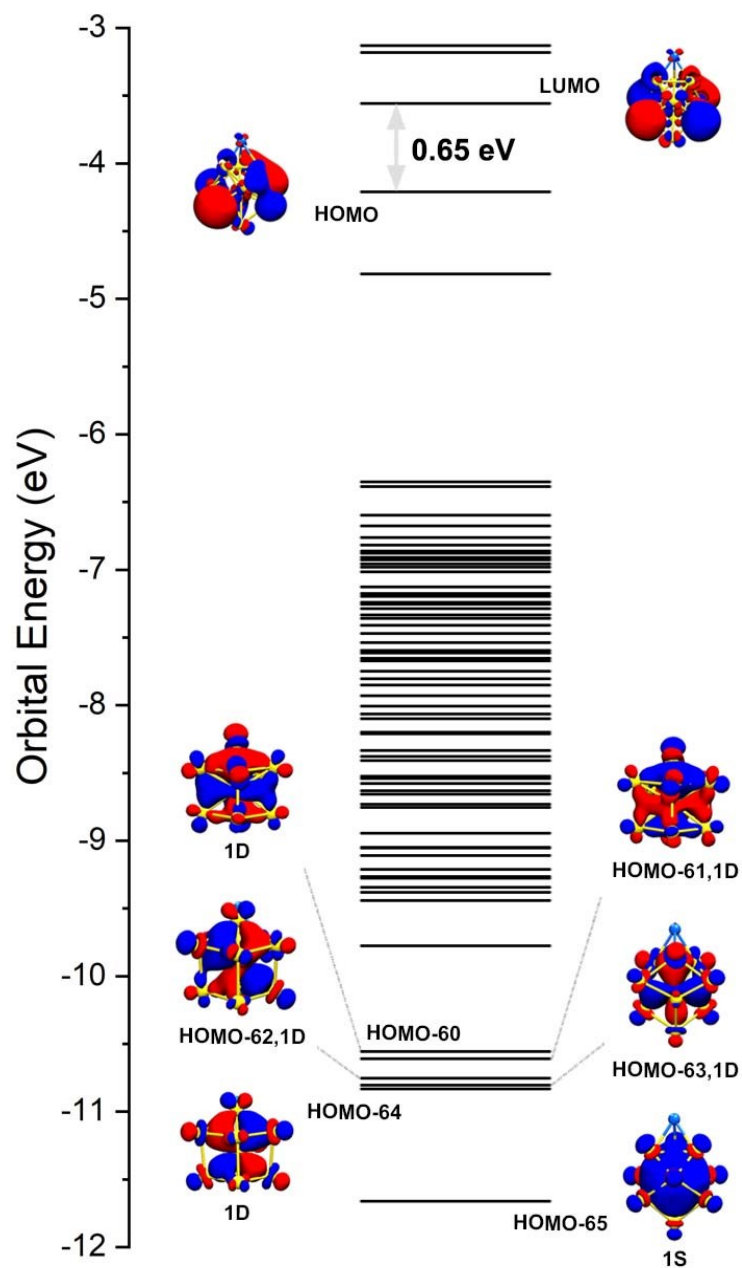

**Fig. S11** The frontier molecular orbitals of the metal core  $\text{Au}_{11}\text{Cu}_1$ , with their superatomic features (1S, 1P, and 1D orbitals) indicated.

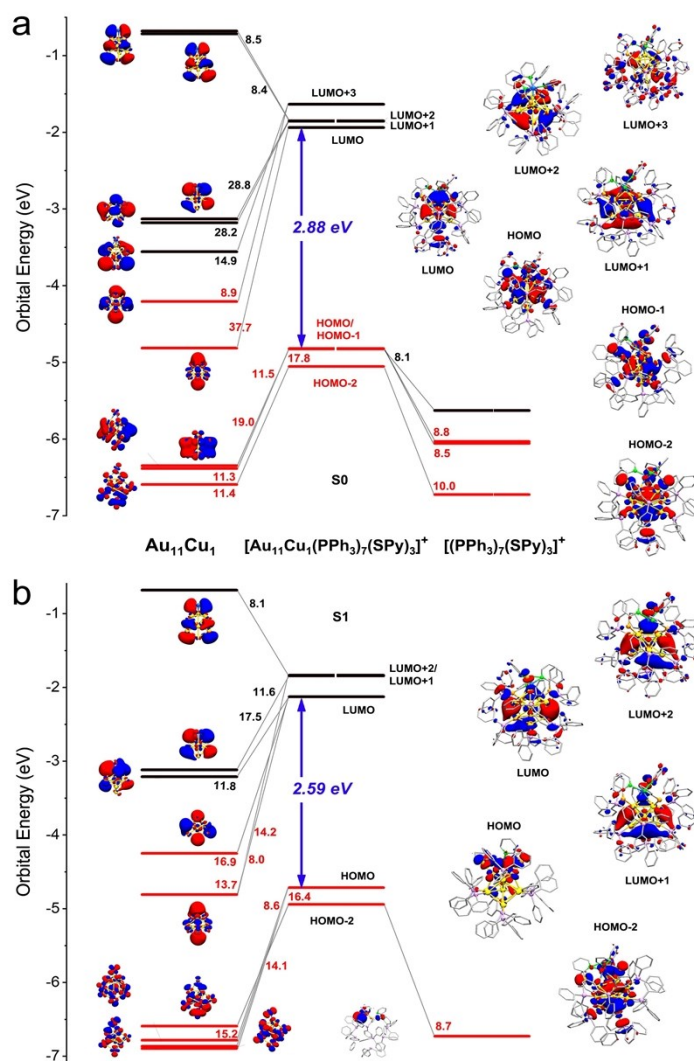

**Fig. S12 Fragment analysis.** Correlation of the frontier molecular orbitals of the metal core and the ligands of the  $[\text{Au}_{11}\text{Cu}_1(\text{PPh}_3)_7(\text{SPy})_3]^+$  cluster at the ground-state  $S_0$  (a) and excitation state  $S_1$  (b). Au yellow, Cu blue, S orange, P violet, N green, C grey. All H atoms are omitted for clarity.

Fragment orbital correlation and electronic structure analysis shows that the  $\text{Au}_{11}\text{Cu}_1$  and the cationic ligands give contributions of 29.3% (17.8%+11.5%) and 16.9% (8.8%+8.1%) to the HOMO orbital at the B3LYP level, respectively, while the HOMO-1 orbital has a 30.3% (19.0%+11.3%) contribution from the neutral  $\text{Au}_{11}\text{Cu}_1$  and 8.5% contribution from the cationic ligands. In comparison with their counterparts at the  $S_1$  minimum, the nature of the LUMO at the  $S_1$  minimum remains almost constant and it still has a much purer contribution from the metal  $\text{Au}_{11}\text{Cu}_1$  core 42.4% (16.9%+11.8%+13.7%). However, the HOMO orbital has more contribution from the metal core, 40.2% (16.4%+15.2%+8.6%) in  $S_1$  vs. 29.3% in  $S_0$ .
